# Supplementary material for: A novel self-assembled sandwich nanomedicine for NIR-responsive release of NO
Source: Royal Society of Chemistry journal article supplement (doi:10.1039/c5nr06630a), 2015-01-01
Supplement: c5nr06630a1.pdf [file c5nr06630a1.pdf]

## Electronic Supplementary Information (ESI)

### Novel self-assembled sandwich nanomedicine for NIR-responsive release of NO

Jing Fan,<sup>a,c,d</sup> Qianjun He,<sup>\*b</sup> Yi Liu,<sup>d</sup> Ying Ma,<sup>d</sup> Xiao Fu,<sup>d</sup> Yijing Liu,<sup>d</sup> Peng Huang,<sup>d</sup> Nongyue He,<sup>\*a</sup> and Xiaoyuan Chen<sup>\*d</sup>

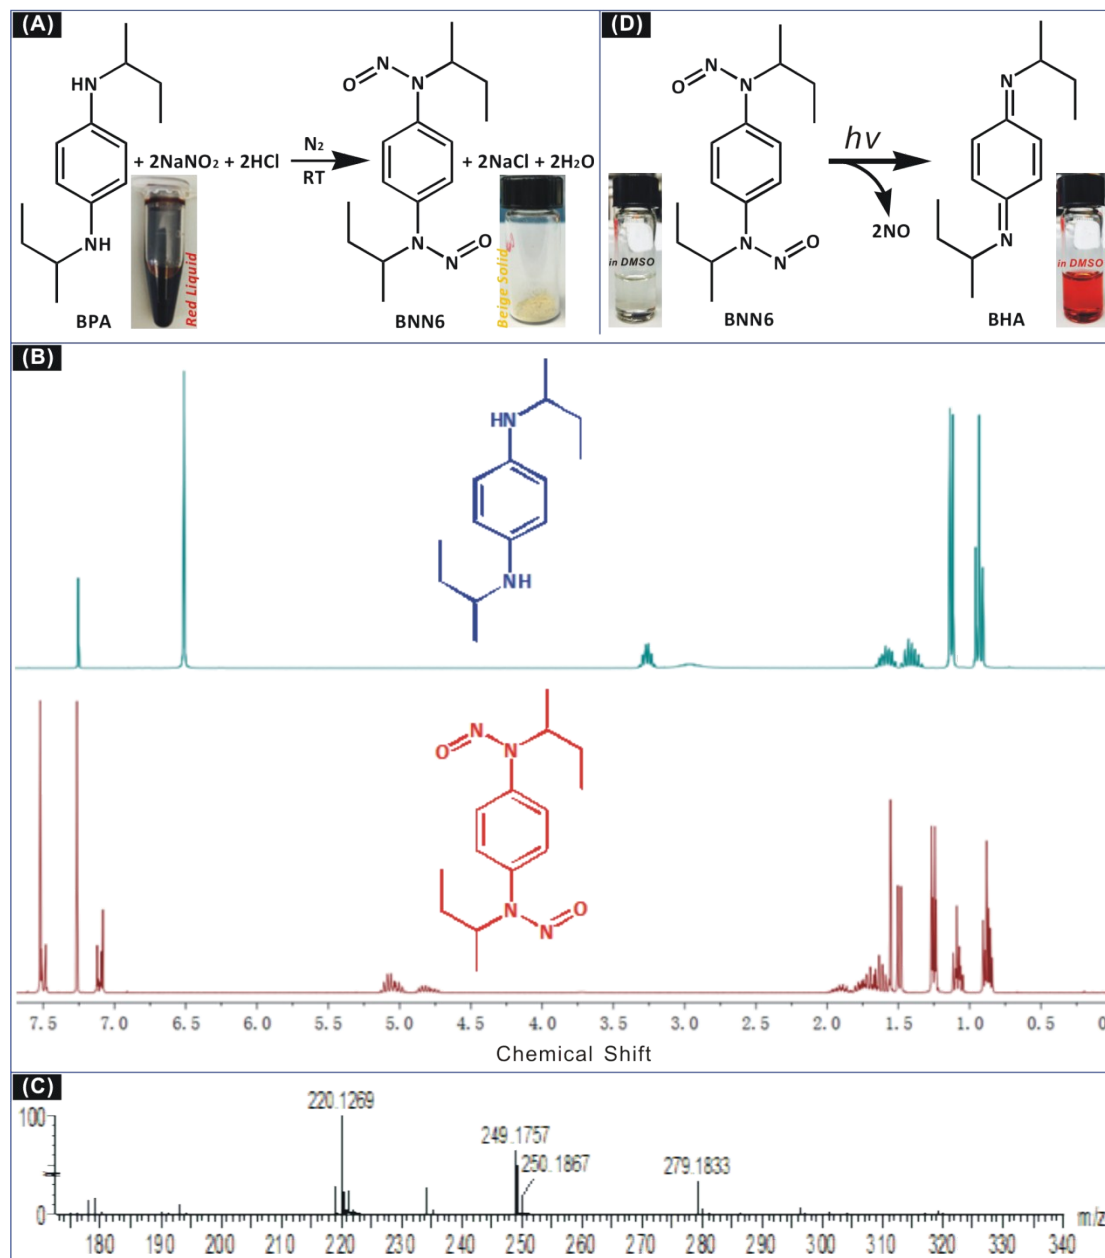

**Figure S1.** (A) The synthesis route of BNN6 and the change from red liquid to beige solid in the reaction process (inset digital pictures); (B) the MS of synthesized BNN6; (C) the photo-decomposition route of BNN6 and the color change during decomposition (inset digital pictures) where 279, 249/250 and 220  $m/z$  represent the whole molecule of BNN6 and two ionized fragments of BNN6, respectively; (D)  $^1\text{H}$  NMR spectra of the reactant BPA and the product BNN6:  $\delta = 7.52$  (4H), 4.95-4.69 (2H), 2.00-1.84 (2H), 1.81-1.69 (2H), 1.48 (t,  $J=7.6\text{Hz}$ , 6H), 1.08 (td,  $J=7.4$ , 5.3Hz, 6H).

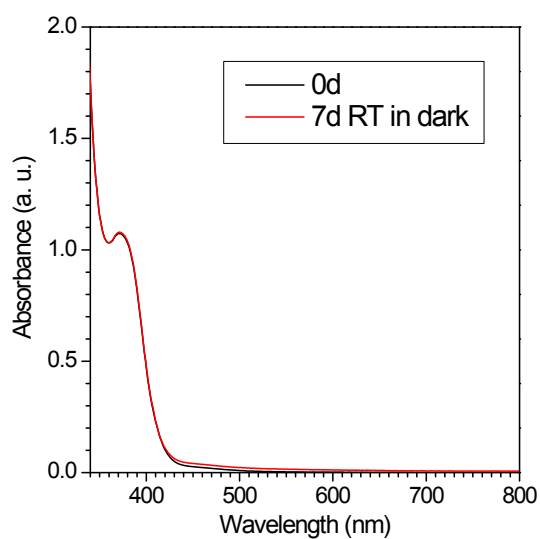

**Figure S2.** Comparison of UV spectra of freshly-prepared GO-BNN6 solution and one stored at RT in dark for 7 d.

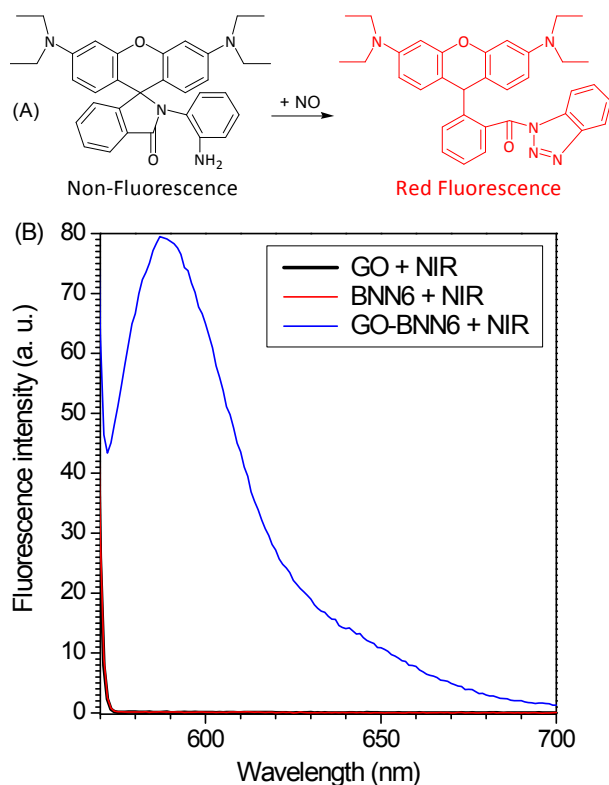

**Figure S3.** The mechanism for NO detection by RBSP fluorescence probe (A), and NIR-responsibility comparison of BNN6 and GO-BNN6 nanomedicine measured by using RBSP fluorescence probe (566 nm excitation) after 2-min irradiation (B).

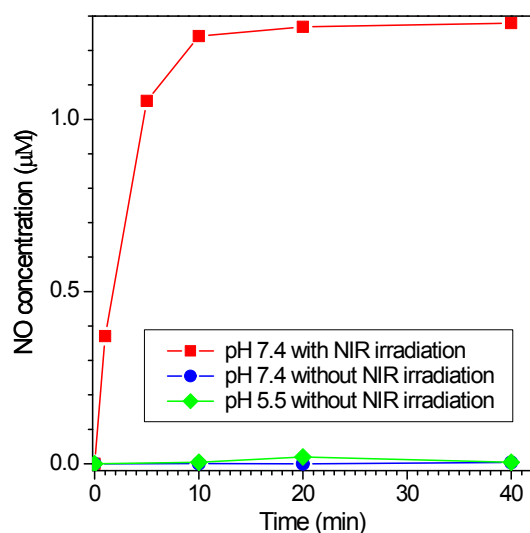

**Figure S4.** Stability of GO-BNN6 in pH 7.4 and 5.5 PBS solutions in the presence and absence of NIR irradiation.

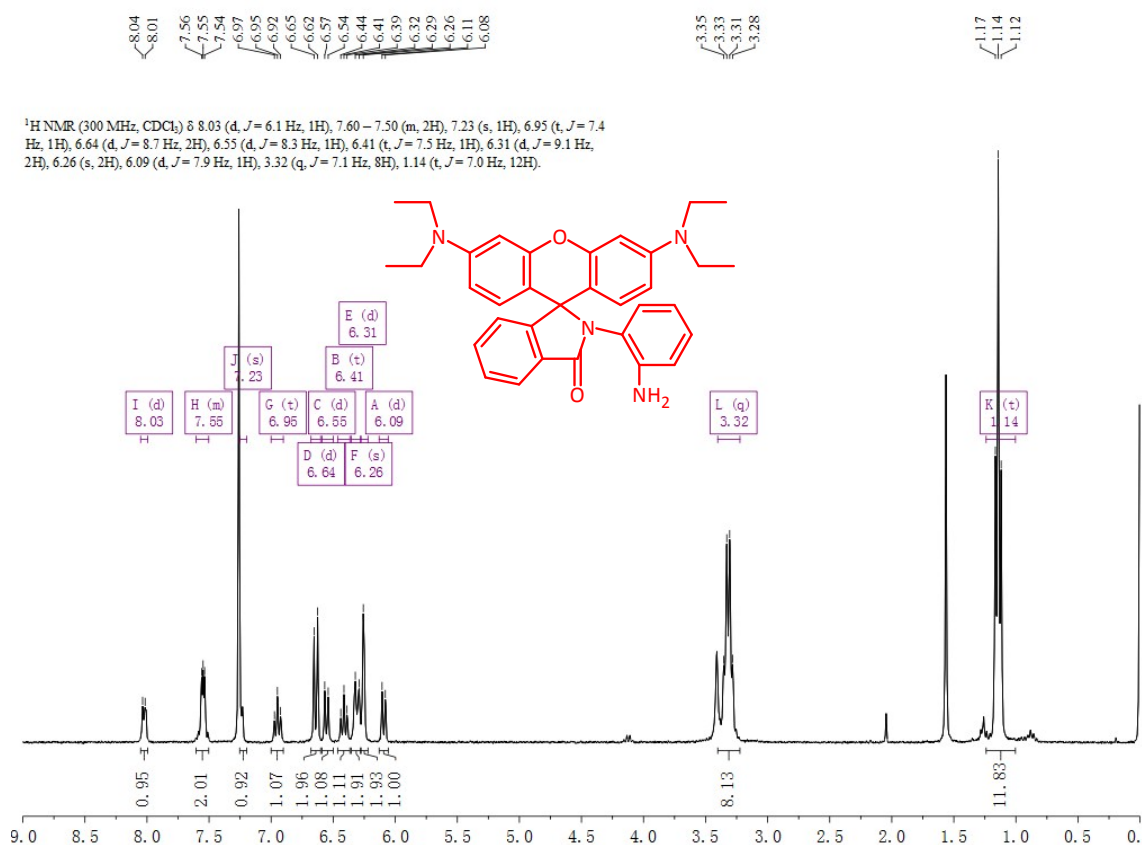

**Figure S5.** <sup>1</sup>H NMR spectrum of RBSP (300 MHz, CDCl<sub>3</sub>): δ 8.03 (d, *J* = 6.1 Hz, 1H), 7.60 – 7.50 (m, 2H), 7.23 (s, 1H), 6.95 (t, *J* = 7.4 Hz, 1H), 6.64 (d, *J* = 8.7 Hz, 2H), 6.55 (d, *J* = 8.3 Hz, 1H), 6.41 (t, *J* = 7.5 Hz, 1H), 6.31 (d, *J* = 9.1 Hz, 2H), 6.26 (s, 2H), 6.09 (d, *J* = 7.9 Hz, 1H), 3.32 (q, *J* = 7.1 Hz, 8H), 1.14 (t, *J* = 7.0 Hz, 12H).
